# Supplementary material for: mRNA-Seq of Single Prostate Cancer Circulating Tumor Cells Reveals Recapitulation of Gene Expression and Pathways Found in Prostate Cancer
Source: PLoS One. 2012 Nov 7;7(11):e49144. doi: 10.1371/journal.pone.0049144 (PMC3492322; doi:10.1371/journal.pone.0049144)
Supplement: Table S4 — Clinical history for patient 1, 2, 3, and 4. Patient age, KLK-3 (PSA) levels and treatment regimens at time of blood collection are listed. (XLS) [file pone.0049144.s004.xls]

## Sheet: Sheet1
Sample #	Age (years)	PSA (ng/ml)	Therapy at the time of Collection
Patient 1	70.2	220.2	Docetaxel/Prednisone/Leuprolide
Patient 2	83	363.9	Docetaxel/Prednisone/Leuprolide
Patient 3	89	1361.3	Nilutamide
Patient 4	74	1147	Itraconozole / Leuprolide
